# Supplementary material
Source: PubMed Central journal article supplement (PMC6218200)
Supplement: NIHMS994708-supplement-Supporting_Information.pdf [file NIHMS994708-supplement-Supporting_Information.pdf]

## Supporting Information

### **Axial PEGylation of Tin Octabutoxy Naphthalocyanine Extends Blood Circulation for Photoacoustic Vascular Imaging**

Haoyuan Huang<sup>†</sup>, Depeng Wang<sup>†</sup>, Yuzhen Zhang<sup>‡</sup>, Yang Zhou<sup>§</sup>, Jumin Geng<sup>†</sup>, Upendra Chitgupi<sup>†</sup>, Timothy R. Cook<sup>‡</sup>, Jun Xia<sup>†</sup>, Jonathan F. Lovell<sup>†\*</sup>

<sup>†</sup>Department of Biomedical Engineering, University at Buffalo, State University of New York, Buffalo, NY, 14260, USA.

<sup>‡</sup>Department of Chemistry, University at Buffalo, State University of New York, Buffalo, NY, 14260, USA.

<sup>§</sup> College of Chemistry, Chemical Engineering and Materials Science, Collaborative Innovation Center of Functionalized Probes for Chemical Imaging in Universities of Shandong, Key Laboratory of Molecular and Nano Probes, Ministry of Education, Shandong Provincial Key Laboratory of Clean Production of Fine Chemicals, Shandong Normal University, Jinan 250014, P.R. China.

[\\*jlovell@buffalo.edu](mailto:*jlovell@buffalo.edu)

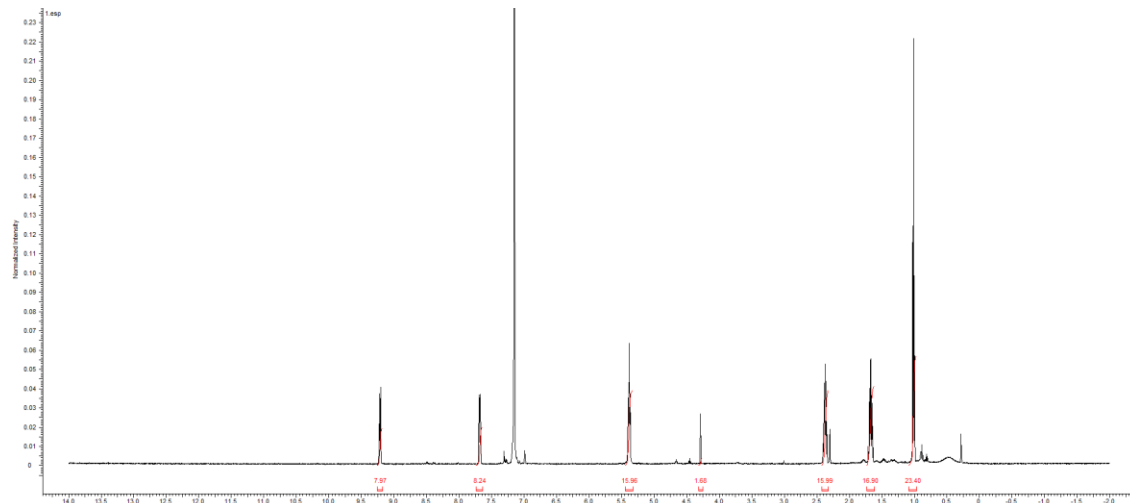

**Figure S1.**  $^1\text{H}$  NMR spectrum of SnONc in benzene-D6.

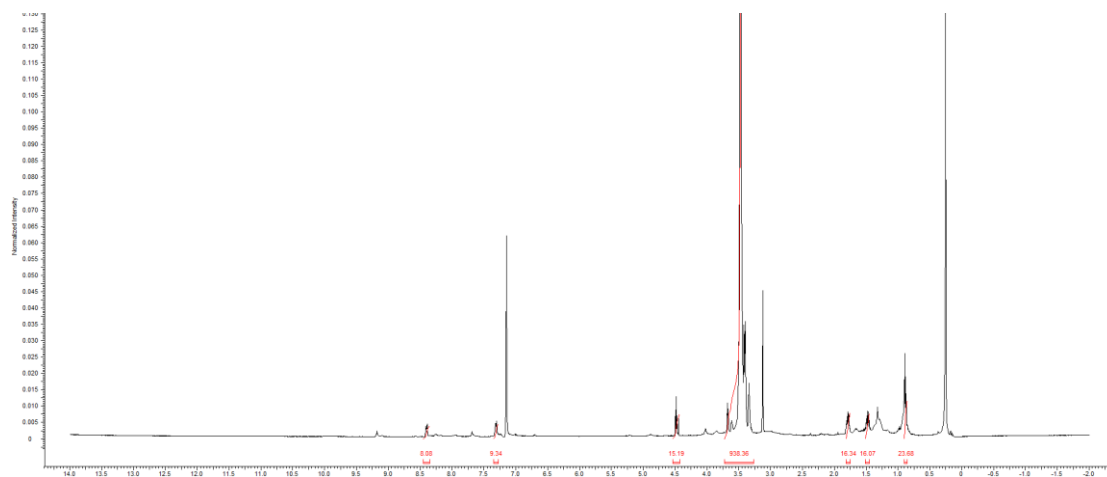

**Figure S2.**  $^1\text{H}$  NMR spectrum of PEG-Sn-ONc in benzene-D6.

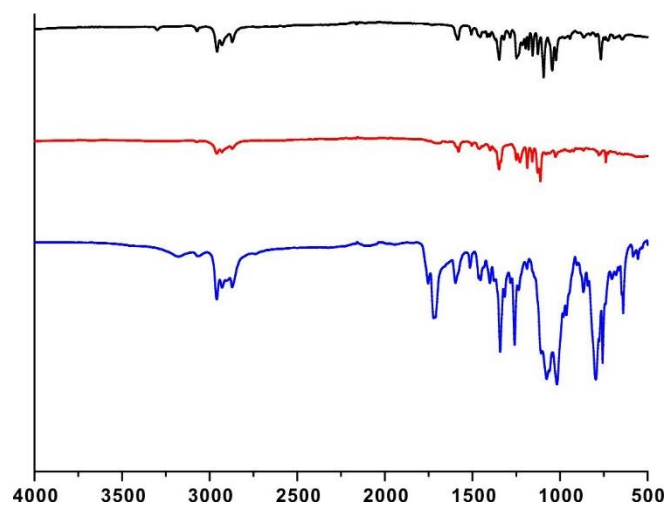

**Figure S3.** IR spectra of ONc (black line), SnONc (red line) and PEG-Sn-ONc (blue line).

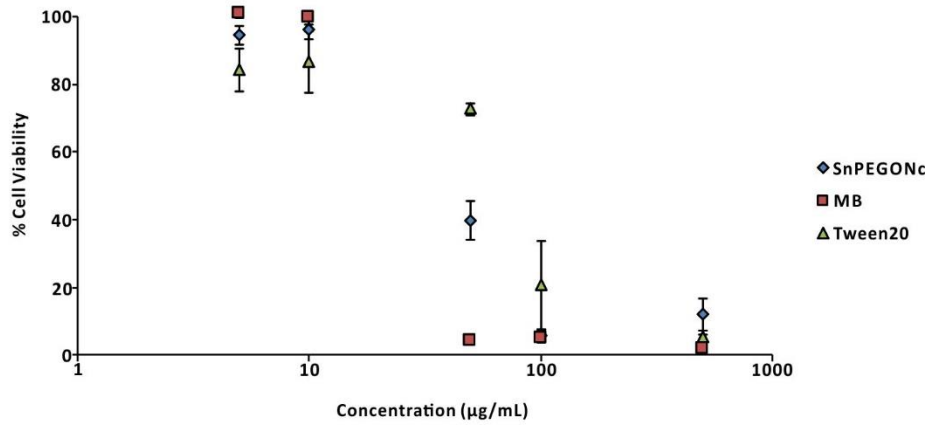

**Figure S4.** Cell viability of U-87 cells incubated with methylene blue, PEG-Sn-ONc or an equivalent amount of TWEEN surfactant alone.

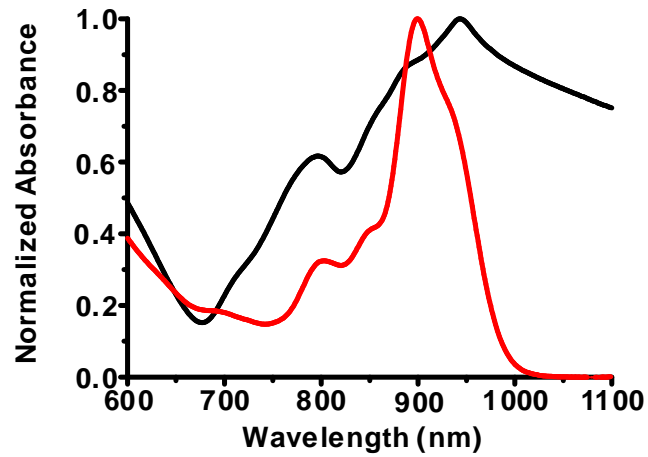

**Figure S5.** Absorbance of PEG-Sn-ONc (red line) and ONc (black line) in TWEEN 20.

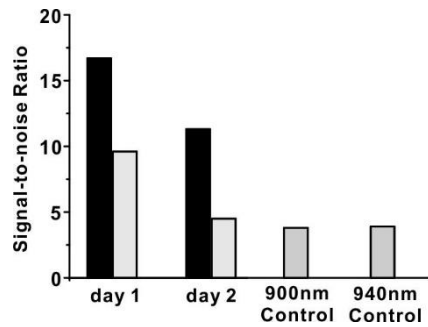

**Figure S6.** Signal-to-noise ratio of brain vessels photoacoustic photos, mice were injected with PEG-Sn-ONc (black bars) and ONc (grey bars), last two bars are control data at 900nm and 940nm respectively.
